# Supplementary material for: Amino Alcohols from Eugenol as Potential Semisynthetic Insecticides: Chemical, Biological, and Computational Insights
Source: MDPI journal article supplement (doi:10.3390/molecules26216616), 2021-10-31
Supplement: s1 [file s1]

# Supplementary Materials

## Amino alcohols from eugenol as potential semisynthetic insecticides: chemical, biological and computational insights

**Renato B. Pereira** <sup>1,†</sup>, **Nuno F. S. Pinto** <sup>2,†</sup>, **Maria José G. Fernandes** <sup>2</sup>, **Tatiana F. Vieira** <sup>3,4</sup>, **Ana Rita O. Rodrigues** <sup>5</sup>, **David M. Pereira** <sup>1</sup>, **Sérgio F. Sousa** <sup>3,4</sup>, **Elisabete M. S. Castanheira** <sup>5</sup>, **A. Gil Fortes** <sup>2</sup> and **M. Sameiro T. Gonçalves** <sup>2,\*</sup>

<sup>1</sup> REQUIMTE/LAQV, Laboratory of Pharmacognosy, Department of Chemistry, Faculty of Pharmacy, University of Porto, R. Jorge Viterbo Ferreira, 228, 4050-313 Porto, Portugal; rjpereira@ff.up.pt (R.B.P.); dpereira@ff.up.pt (D.M.P.)

<sup>2</sup> Centre of Chemistry, Department of Chemistry, University of Minho, Campus of Gualtar, 4710-057 Braga, Portugal; nuno\_pinto1993@hotmail.com (N.F.S.P.); mjfernandes@quimica.uminho.pt (M.J.G.F.); gilf@quimica.uminho.pt (A.G.F.)

<sup>3</sup> Associate Laboratory i4HB—Institute for Health and Bioeconomy, Faculty of Medicine, University of Porto, 4200-319 Porto, Portugal; segiofsousa@med.up.pt (S.F.S.); tatianafvieira@gmail.com (T.F.V.)

<sup>4</sup> UCIBIO—Applied Molecular Biosciences Unit, BioSIM—Department of Biomedicine, Faculty of Medicine, University of Porto, 4200-319 Porto, Portugal

<sup>5</sup> Centre of Physics of Minho and Porto Universities (CF-UM-UP), University of Minho, Campus of Gualtar, 4710-057 Braga, Portugal; ritarodrigues@fisica.uminho.pt (A.R.O.R.); ecoutinho@fisica.uminho.pt (E.M.S.C.)

\* Corresponding author: [msameiro@quimica.uminho.pt](mailto:msameiro@quimica.uminho.pt); Tel.: + 351-253-604-372

† These authors contributed equally to this work.

## 1. Creation of a Homology Model

The model generated by SWISS-MODEL for 1QON was used in the MD simulations since the gap that was missing from the original structure was distant from the active site.

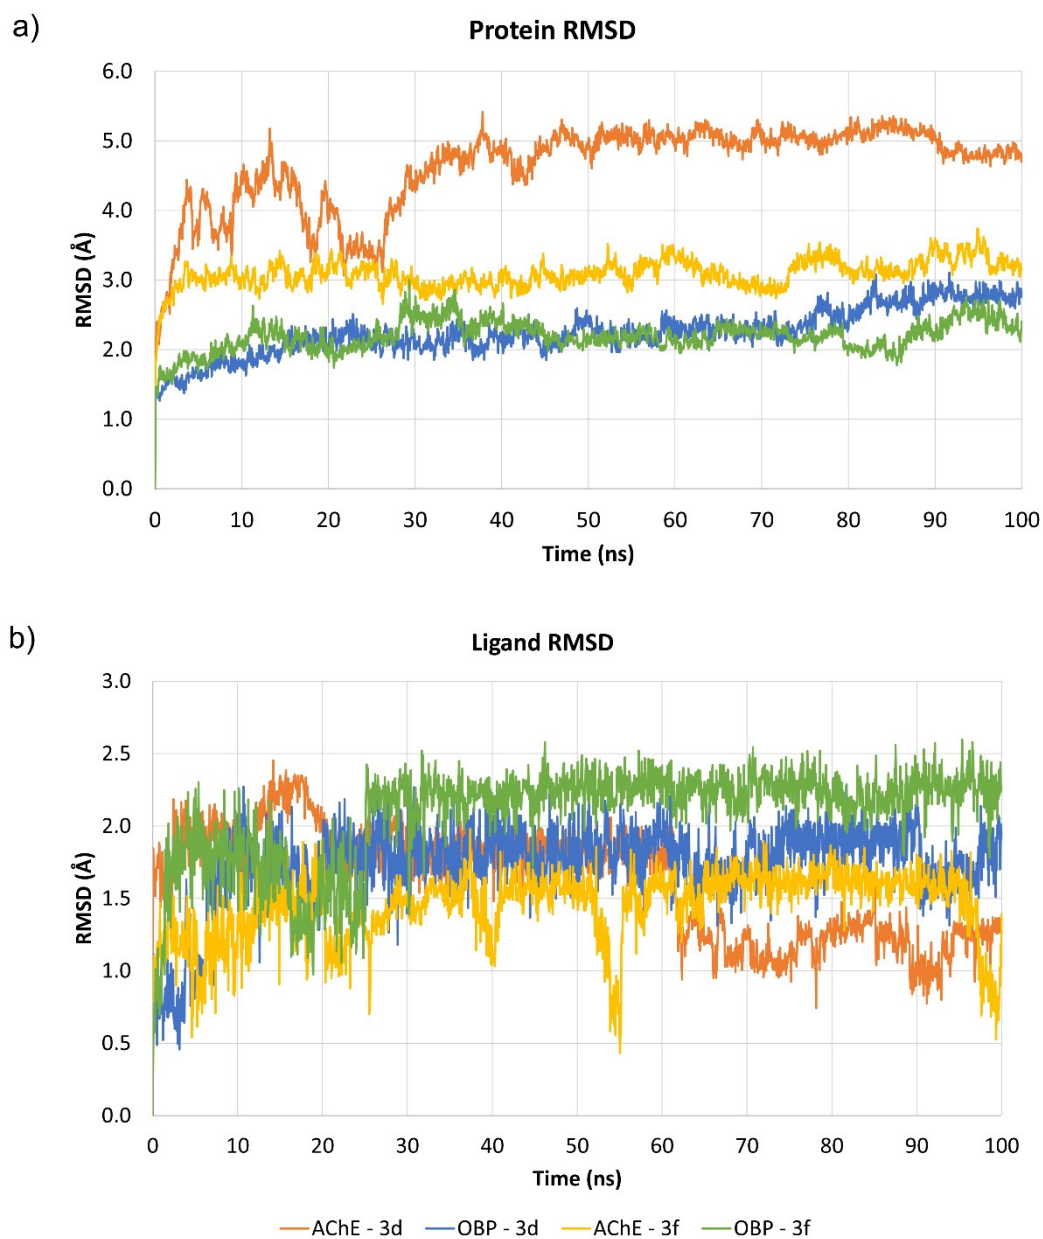

**Figure S1.** Protein and ligand RMSD (Å) of the AChE and OBP – ligand complexes.

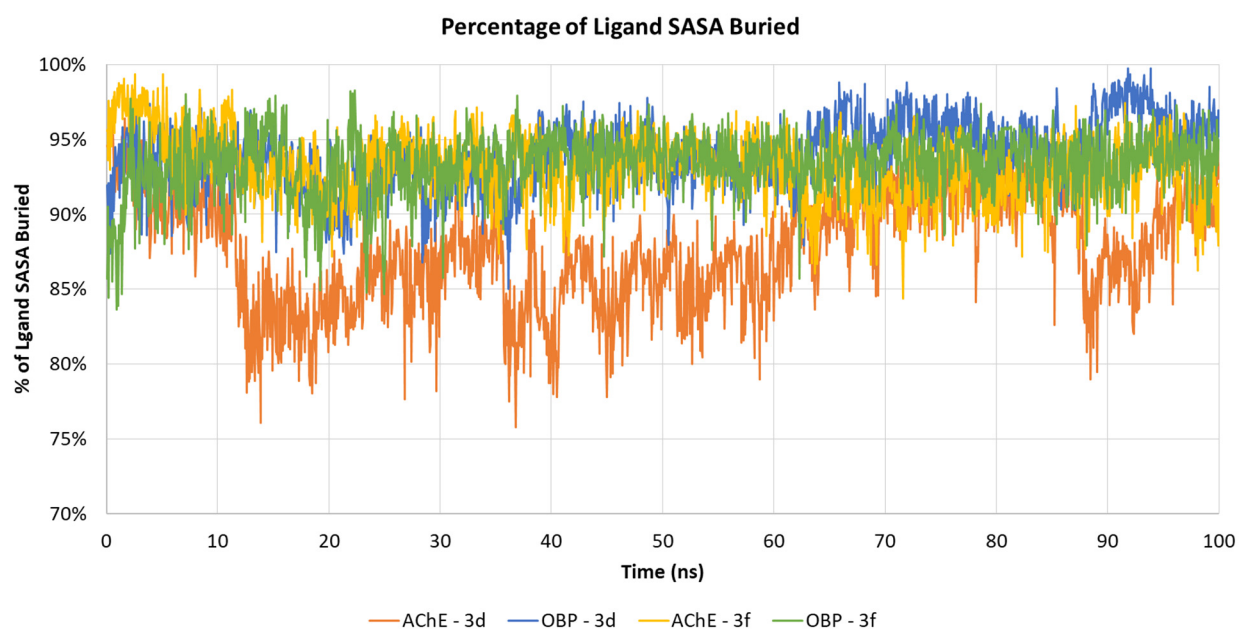

**Figure S2.** Percentage of the potential solvent accessible surface area of the ligands that is buried by the protein targets evaluated.

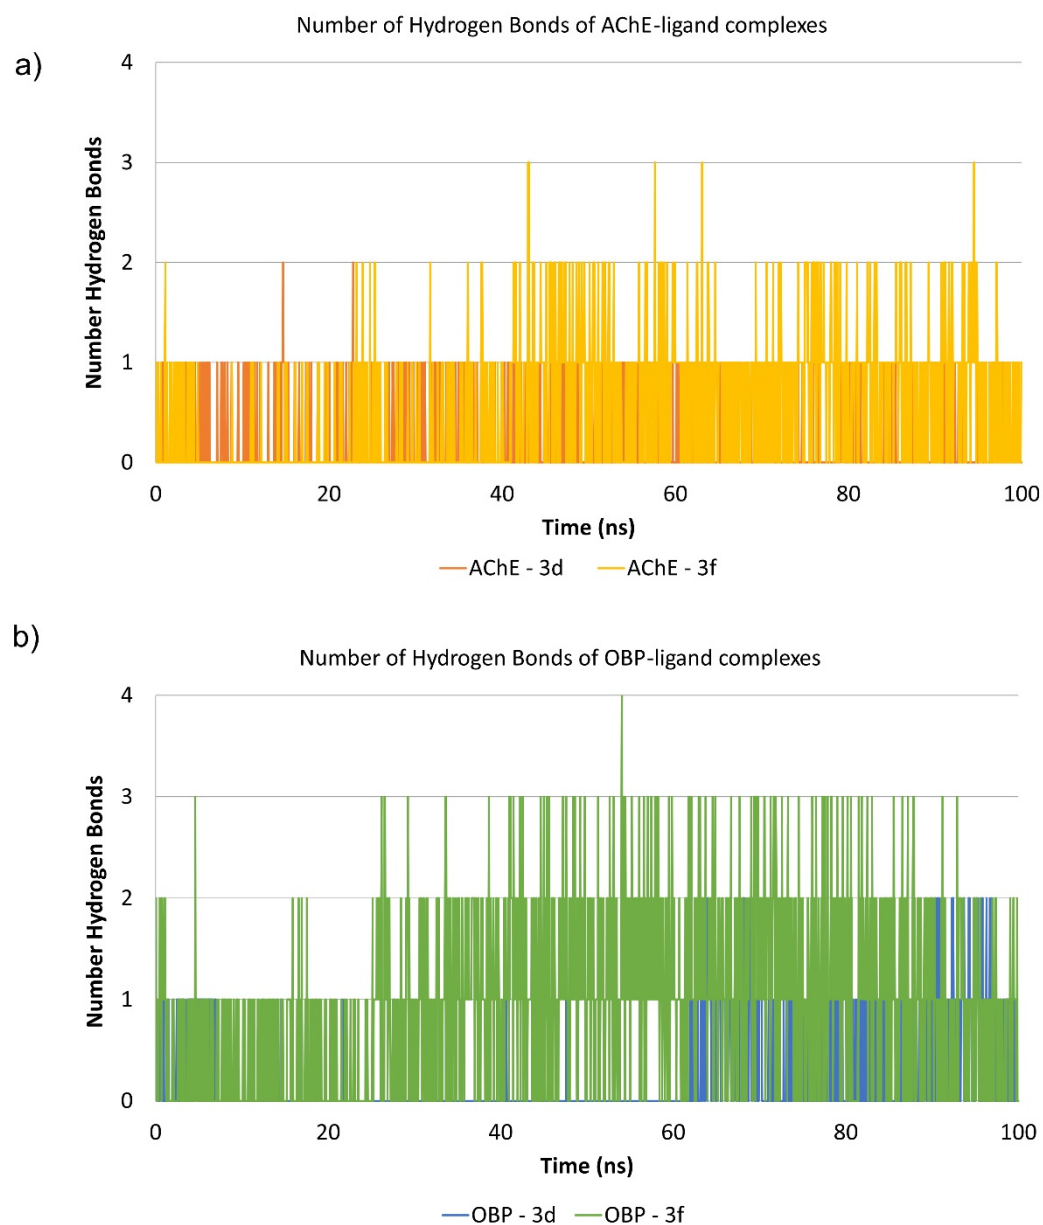

**Figure S3.** Number of ligand-target hydrogen bonds formed during the simulations for compound **3d** and **3f** when complexed with AchE and OBP.

**Table S1.** Docking scores for compound **3d** and **3f** in complex with Human and insect AChE.

|             |           | PLP   | ASP   | ChemScore | GoldScore | Vina |
|-------------|-----------|-------|-------|-----------|-----------|------|
| Human AChE  | <b>3d</b> | 78.04 | 50.27 | 39.38     | 62.94     | -8.2 |
| Insect AChE | <b>3d</b> | 86.78 | 57.17 | 39.08     | 69.49     | -8.9 |
| Human AChE  | <b>3f</b> | 76.74 | 53.87 | 32.95     | 64.08     | -8.3 |
| Insect AChE | <b>3f</b> | 91.73 | 60.25 | 24.66     | 73.33     | -8.9 |

## 2. Compound release kinetics

**Table S2.** Parameters of the Weibull model for the release of compound **3f** from liposomes and corresponding coefficients of determination ( $R^2$ ).

|                   | T (°C) | $Y_{max}$ | $b$  | $a$  | $R^2$ |
|-------------------|--------|-----------|------|------|-------|
| DMPG (100%)       | 20     | 39.28     | 0.67 | 0.26 | 0.99  |
|                   | 35     | 58.56     | 1.35 | 0.14 | 0.99  |
| DPPC:DMPG (50:50) | 20     | 14.30     | 1.16 | 0.17 | 0.99  |
|                   | 35     | 15.45     | 1.26 | 0.12 | 0.98  |

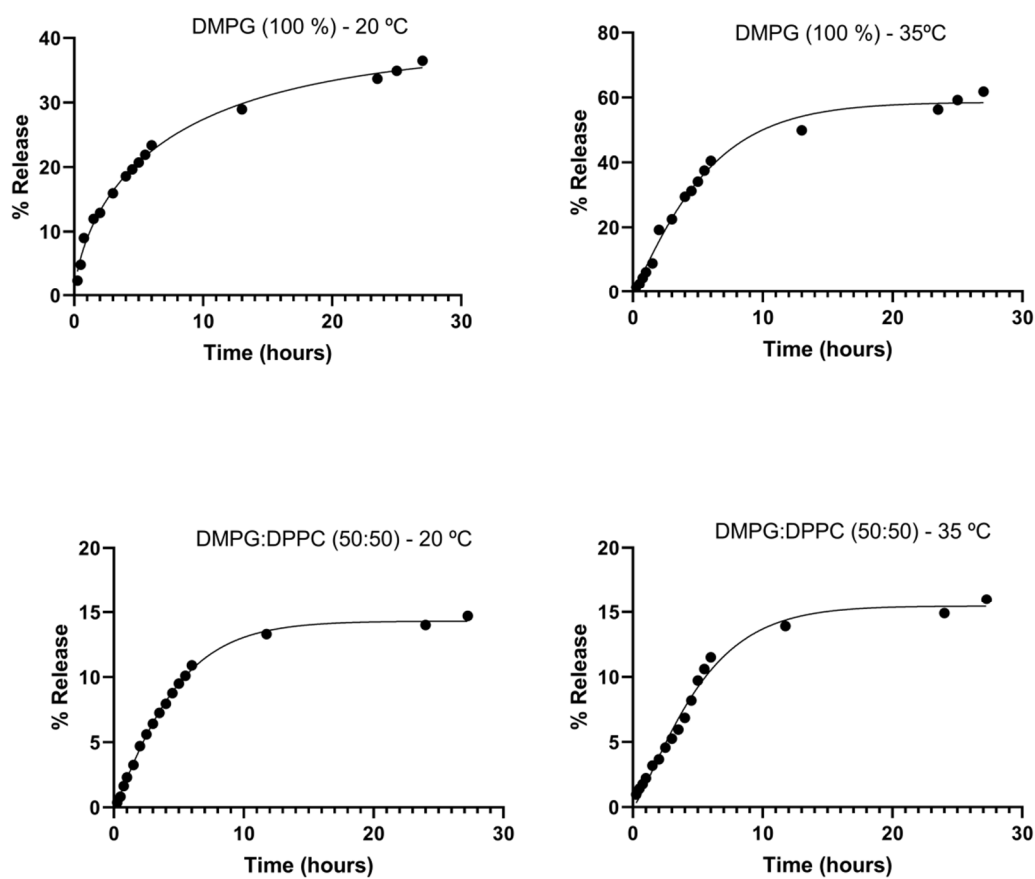

**Figure S4.** Fitting of the release profiles to the Weibull model.

### 3. Molecular docking and inverted virtual screening studies

**Table S3.** List of targets selected for the inverted virtual screening study.

| Target                                                     | Organism                       | PDB target | Resolu-<br>tion<br>(Å) | Description                                                                                                                                                                                | Ref. |
|------------------------------------------------------------|--------------------------------|------------|------------------------|--------------------------------------------------------------------------------------------------------------------------------------------------------------------------------------------|------|
| Ecdysone receptor                                          | <i>Heliothis virescens</i>     | 1R20       | 3.00                   | VS based on 1R20 bound to an agonist as a model for the development of a receptor-based pharmacophore model.                                                                               | 1    |
|                                                            |                                | 1R1K       | 2.90                   | VS of 2 million compounds against 1R1K, an ecdysone receptor structure bound to its known ligand ponasterone A.                                                                            | 2    |
| Chitinase                                                  | <i>Ostrinia furnacalis</i>     | 3WL1       | 1.77                   | Pharmacophore-based screening using two crystal structures of chitinases: 3WL1 bound to its reaction product and 3WQV bound to an inhibitor.                                               | 3    |
| 3WQV                                                       |                                | 2.04       |                        |                                                                                                                                                                                            |      |
| beta-N-acetyl-D-hexosaminidase OfHex1                      |                                | 3NSN       | 2.10                   | VS of the ZINC database to identify OfHex1 inhibitors using 3NSN crystal structure bound to a known inhibitor.                                                                             | 4    |
|                                                            |                                | 3OZP       | 2.00                   | VS of the ZINC data-base targeting 3OZP, a crystal structure of OfHex1 bound to an inhibitor.                                                                                              | 5    |
| N-Acetyl-glucosamine-1-phosphate uridyl-transferase (GlmU) | <i>Xanthomonas oryzae</i>      | 2V0K       | 2.30                   | Homology model built for docking using 2V0K and 2VD4 as templates. 2V0K crystal structure is bound to its known ligand and 2VD4 is bound to a possible inhibitor.                          | 6    |
|                                                            |                                | 2VD4       | 1.90                   |                                                                                                                                                                                            |      |
| Acetylcholines-terase                                      | <i>Aedes aegypti</i>           | 1QON       | 2.72                   | Search for new molecules with insecticidal activity against <i>Ae. Aegypti</i> using acetylcholinesterase crystal structures 1QON and 4EY6 as targets, both bound to possible inhibitors.  | 7    |
|                                                            |                                | 4EY6       | 2.40                   |                                                                                                                                                                                            |      |
|                                                            | <i>Drosophila melanogaster</i> | 1DX4       | 2.70                   | Homology 3D model built for VS using 1DX4 as template. 1DX4 crystal structure is bound to a potent inhibitor.                                                                              | 8    |
| Prophenol-oxidase (PPO)                                    | <i>Manduca sexta</i>           | 3HSS       | 1.97                   | Crystal structure of a prophenoloxidase from <i>Manduca sexta</i> .                                                                                                                        | 9    |
| p-Hydroxyphenyl-pyruvate dioxygenase                       | <i>Arabidopsis thaliana</i>    | 6ISD       | 2.40                   | Development of a receptor-ligand pharmacophore model based on the crystal structure 6ISD bound to a commonly used pesticide. The best model created was then used for VS studies.          | 10   |
| Voltage-gated sodium channel                               | <i>Periplaneta americana</i>   | 6A95       | 2.60                   | Crystallographic structure of a Voltage-gated sodium channel NavPaS bound to a pore blocker, tetrodotoxin (TTX)                                                                            | 11   |
| Octopamine receptor                                        | <i>Blattella germanica</i>     | 4N7C       | 1.75                   | Crystal structure of Bla g 4, an octopamine receptor, bound to tyramine.                                                                                                                   | 12   |
| Sterol carrier protein-2 (HaSCP-2)                         | <i>Helicoverpa armigera</i>    | 4UEI       | Solutio<br>n NMR       | Structure-based VS of a database of commercially available compounds to find potential inhibitors of HaSCP-2. The residues Phe53, Thr128, and Gln131 were selected for the binding cavity. | 13   |

|                                                 |                                |      |      |                                                                                                                                                                                                                                         |    |
|-------------------------------------------------|--------------------------------|------|------|-----------------------------------------------------------------------------------------------------------------------------------------------------------------------------------------------------------------------------------------|----|
| <b>Peptide deformylase</b>                      | <i>Xanthomonas oryzae</i>      | 5CY8 | 2.38 | Docking and VS of a library of 318 phytochemicals. 5CY8 crystal structure is bound to a possible inhibitor.                                                                                                                             | 14 |
| <b>Alpha-esterase-7 (<math>\alpha</math>E7)</b> | <i>Lucilia cuprina</i>         | 5TYJ | 1.75 | Computational design of potent and selective covalent inhibitors of $\alpha$ E7. 5TYJ and 5TYP crystal structures are bound to inhibitors: (3-bromo-5-phenoxyphenyl)boronic acid and (3-bromo-4-methylphenyl)boronic acid respectively. | 15 |
|                                                 |                                | 5TYP | 1.88 |                                                                                                                                                                                                                                         |    |
| <b>Odorant Binding Protein</b>                  | <i>Aedes aegypti</i>           | 5V13 | 1.84 | Search for new molecules with insecticidal activity against <i>Ae. Aegypti</i> using a crystal structure of a mosquito juvenile hormone-binding protein, 5V13 bound to its natural hormone.                                             | 7  |
|                                                 | <i>Drosophila melanogaster</i> | 2GTE | 1.40 | 2GTE crystal structure is bound to its natural ligand                                                                                                                                                                                   | 16 |
|                                                 | <i>Anopheles gambiae</i>       | 3N7H | 1.60 | QSAR and docking studies for the rational design of mosquito repellents using the crystal structure 3K1E bound to a polyethylene glycol molecule. 3N7H crystal structure is bound to a commonly used repellent.                         | 17 |
|                                                 | <i>Aedes aegypti</i>           | 3K1E | 1.85 |                                                                                                                                                                                                                                         |    |

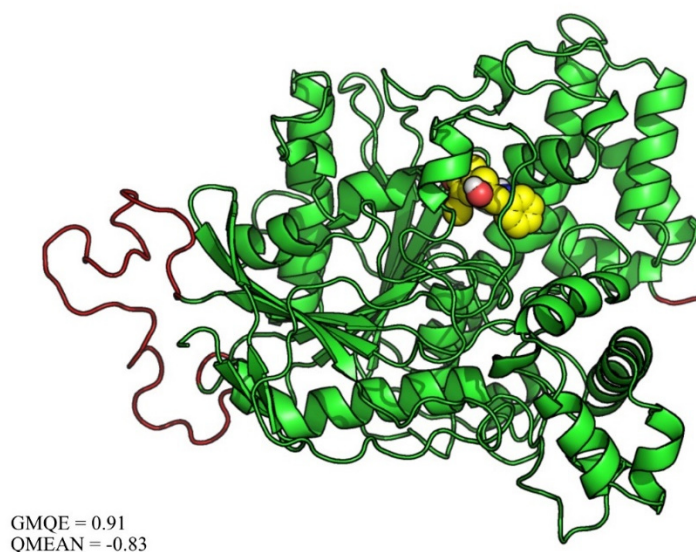

**Figure S5.** Homology model built for 1QON. Green is the original structure and red represents the loop that was generated by SWISS-MODEL. In yellow is the ligand molecule (**3d**). GMQE - Global Model Quality Estimation, is expressed between 0 and 1 with a higher number meaning higher reliability. QMEAN - provides an estimate of the "degree of nativeness" of the structural features observed in the model. A value of QMEAN around zero indicate a good agreement between the model and experimental structure.

## References

1. Hu, X.; Yin, B.; Cappelle, K.; Swevers, L.; Smagghe, G.; Yang, X.; Zhang, L. Identification of novel agonists and antagonists of the ecdysone receptor by virtual screening. *J Mol Graph Model* **2018**, *81*, 77–85.
2. Harada, T.; Nakagawa, Y.; Ogura, T.; Yamada, Y.; Ohe, T.; Miyagawa, H. Virtual screening for ligands of the insect molting hormone receptor. *J Chem Inf Model* **2011**, *51*, 296–305.
3. Dong, Y.; Jiang, X.; Liu, T.; Ling, Y.; Yang, Q.; Zhang, L.; He, X. Structure-based virtual screening, compound synthesis, and bioassay for the design of chitinase inhibitors. *J Agric Food Chem* **2018**, *66*(13), 3351–3357.
4. Liu, J.; Liu, M.; Yao, Y.; Wang, J.; Li, Y.; Li, G.; Wang, Y. Identification of novel potential  $\beta$ -N-acetyl-D-hexosaminidase inhibitors by virtual screening, molecular dynamics simulation and MM-PBSA calculations. *Int J Mol Sci* **2012**, *13*, 4545–4563.
5. Dong, L.; Shen, S.; Xu, Y.; Wang, L.; Yang, Q.; Zhang, J.; Lu, H. Identification of novel insect  $\beta$ -N-acetylhexosaminidase OfHex1 inhibitors based on virtual screening, biological evaluation, and molecular dynamics simulation. *J Biomol Struct Dyn* **2021**, *39*, 1735–1743.
6. Min, J.; Lin, D.; Zhang, Q.; Zhang, J.; Yu, Z. Structure-based virtual screening of novel inhibitors of the uridyltransferase activity of *Xanthomonas oryzae* pv. *oryzae* GlmU. *Eur J Med Chem* **2012**, *53*, 150–158.
7. Ramos, R.S.; Costa, J.S.; Silva, R.C.; Costa, G.V.; Rodrigues, A.B.L.; Rabelo, E.M.; Souto, R.N.P.; Taft, C.A.; Silva, C.H.T.P.; Rosa, J.M.C.; Santos, C.B.R.; Macêdo, W.J.C. Identification of potential inhibitors from pyriproxyfen with insecticidal activity by virtual screening. *Pharmaceuticals* **2019**, *12*, 20.
8. Riva, C.; Suzanne, P.; Charpentier, G.; Dulin, F.; Halm-Lemeille, M.P.; Santos, J.S.O. In silico chemical library screening and experimental validation of novel compounds with potential varroacide activities. *Pestic Biochem Physiol* **2019**, *160*, 11–19.
9. Fattouch, S.; Raboudi-Fattouch, F.; Ponce, J.V.; Forment, J.V.; Lukovic, D.; Marzouki, N.; Vidal, D.R. Concentration dependent effects of commonly used pesticides on activation versus inhibition of the quince (*Cydonia Oblonga*) polyphenol oxidase. *Food Chem Toxicol* **2010**, *48*, 957–963.
10. Fu, Y.; Liu, Y.-X.; Kang, T.; Sun, Y.-N.; Li, J.-Z.; Ye, F. Identification of novel inhibitors of p-hydroxyphenylpyruvate dioxygenase using receptor-based virtual screening. *J Taiwan Inst Chem Eng* **2019**, *103*, 33–43.
11. Shen, H.; Li, Z.; Jiang, Y.; Pan, X.; Wu, J.; Cristofori-Armstrong, B.; Smith, J.J.; Chin, Y.K.Y.; Lei, J.; Zhou, Q.; King, G.F.; Yan, N. Structural basis for the modulation of voltage-gated sodium channels by animal toxins. *Science* **2018**, *362*, 1–8.
12. Offermann, L.R.; Chan, S.L.; Osinski, T.; Tan, Y.W.; Chew, F.T.; Sivaraman, J.; Mok, Y.K.; Minor, W.; Chruszcz, M. The major cockroach allergen Bla g 4 binds tyramine and octopamine. *Mol Immunol* **2014**, *60*, 86–94.
13. Cai, J.; Du, X.; Wang, C.; Lin, J.; Du, X. Identification of potential *helicoverpa armigera* (Lepidoptera: Noctuidae) sterol carrier protein-2 inhibitors through high-throughput virtual screening. *J Econ Entomol* **2017**, *110*, 1779–1784.
14. Joshi, T.; Joshi, T.; Sharma, P.; Chandra, S.; Pande, V. Molecular docking and molecular dynamics simulation approach to screen natural compounds for inhibition of *Xanthomonas oryzae* pv. *Oryzae* by targeting peptide deformylase. *J Biomol Struct Dyn* **2021**, *39*, 823–840.
15. Correya, G.J.; Zaidman, D.; Harmelin, A.; Carvalho, S.; Mabbitta, P.D.; Calaora, V.; James, P.J.; Kotzeg, A.C.; Jackson, C.J.; London, N. Overcoming insecticide resistance through computational inhibitor design. *Proc Natl Acad Sci* **2019**, *116*, 21012–21021.
16. Laughlin, J.D.; Ha, T.S.; Jones, D.N.M.; Smith, D.P. Activation of pheromone-sensitive neurons is mediated by conformational activation of pheromone-binding protein. *Cell* **2008**, *133*, 1255–1265.
17. Oliferenko, P.V.; Oliferenko, A.A.; Poda, G.I.; Osolodkin, D.I.; Pillai, G.G.; Bernier, U.R.; Tsikolia, M.; Agramonte, N.M.; Clark, G.G.; Linthicum, K.J.; Katritzky, A.R. Promising *aedes aegypti* repellent chemotypes identified through integrated QSAR, virtual screening, synthesis, and bioassay. *PLoS One* **2013**, *8*, 2 e64547.
